# Supplementary material for: PIP2 activation of the cardiac IKs potassium channel
Source: Research Square preprint supplement (doi:10.21203/rs.3.rs-7609003/v1), 2025-10-21
Supplement: Supplementary file 1 [file 1dc43d3480c40317254a09a0.docx]

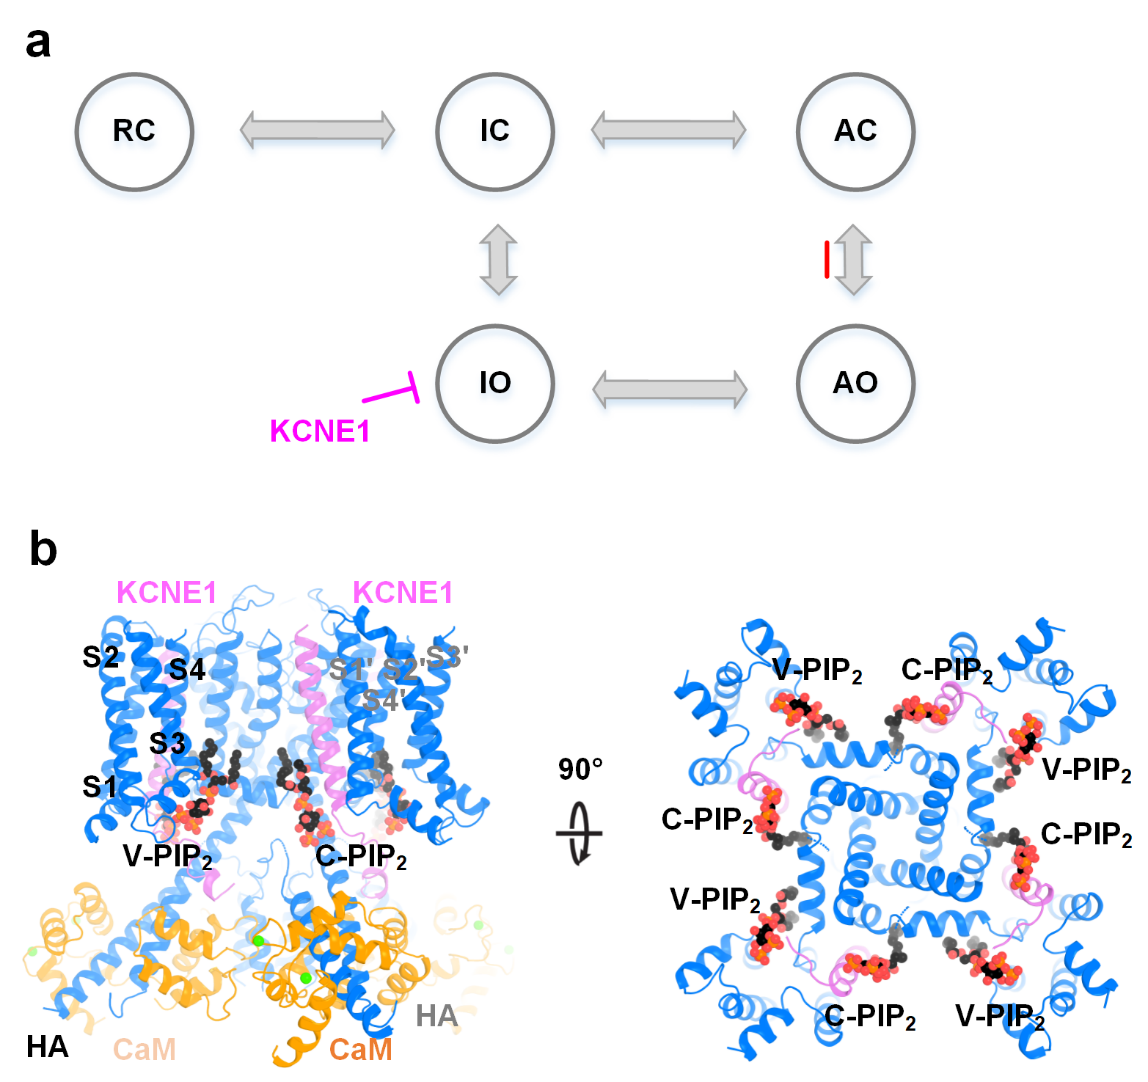


**Fig. S1 KCNQ1 gating and structure models**. (**a**) Kinetic model of KCNQ1 gating. RC: resting-closed; IC: intermediate-closed; AC: activated-closed; IO: intermediate-open; AO: activated-open. KCNE1 specifically suppresses the IO state. (**b**) Structure model for KCNQ1-KCNE1-CaM-PIP2. KCNQ1, KCNE1, PIP2 and CaM are colored in blue, magenta, black and orange, respectively. V-PIP2 and C-PIP2 are shown with ball-and-stick models. VSD helices of neighboring KCNQ1 subunit are labelled with S1’, S2’, S3’ and S4’. Panels are viewed from parallelled to membrane (left) and cytosol side (right), respectively.


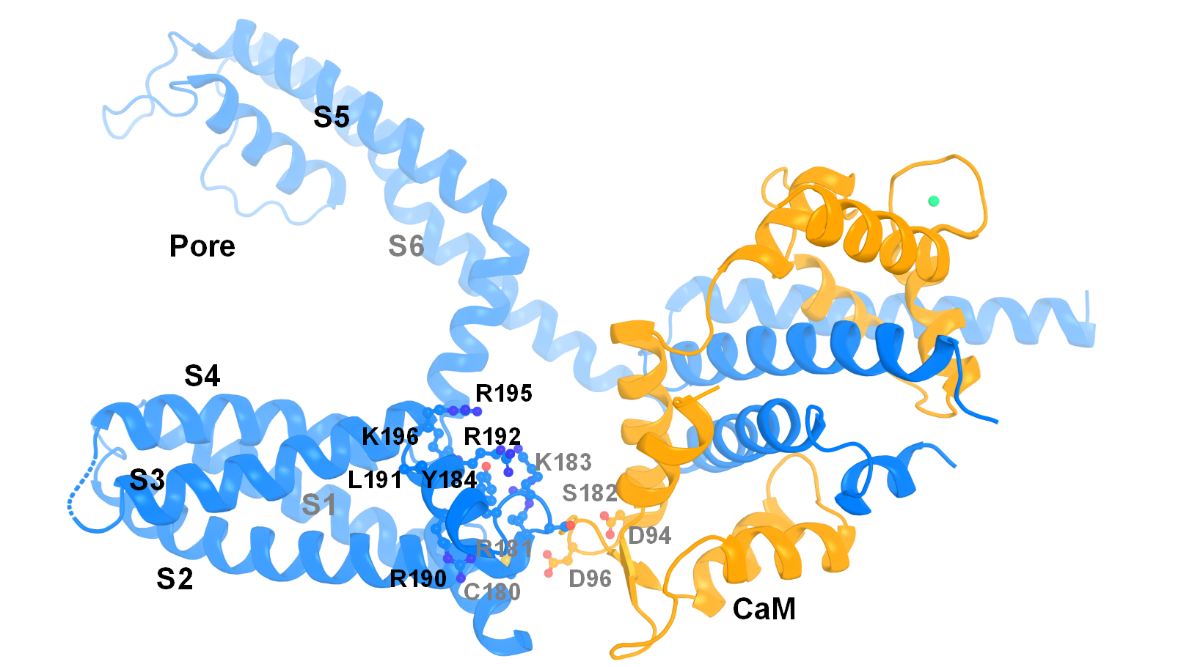


**Fig. S2 Putative interactions between KCNQ1-VSD and CaM**. Mutation scanning in both KCNQ1-S2S3L (C180, R181, S182, K183, Y184, L191 and R192) or the S3 (R195 and K196) with CaM (D94 and D96), respectively.


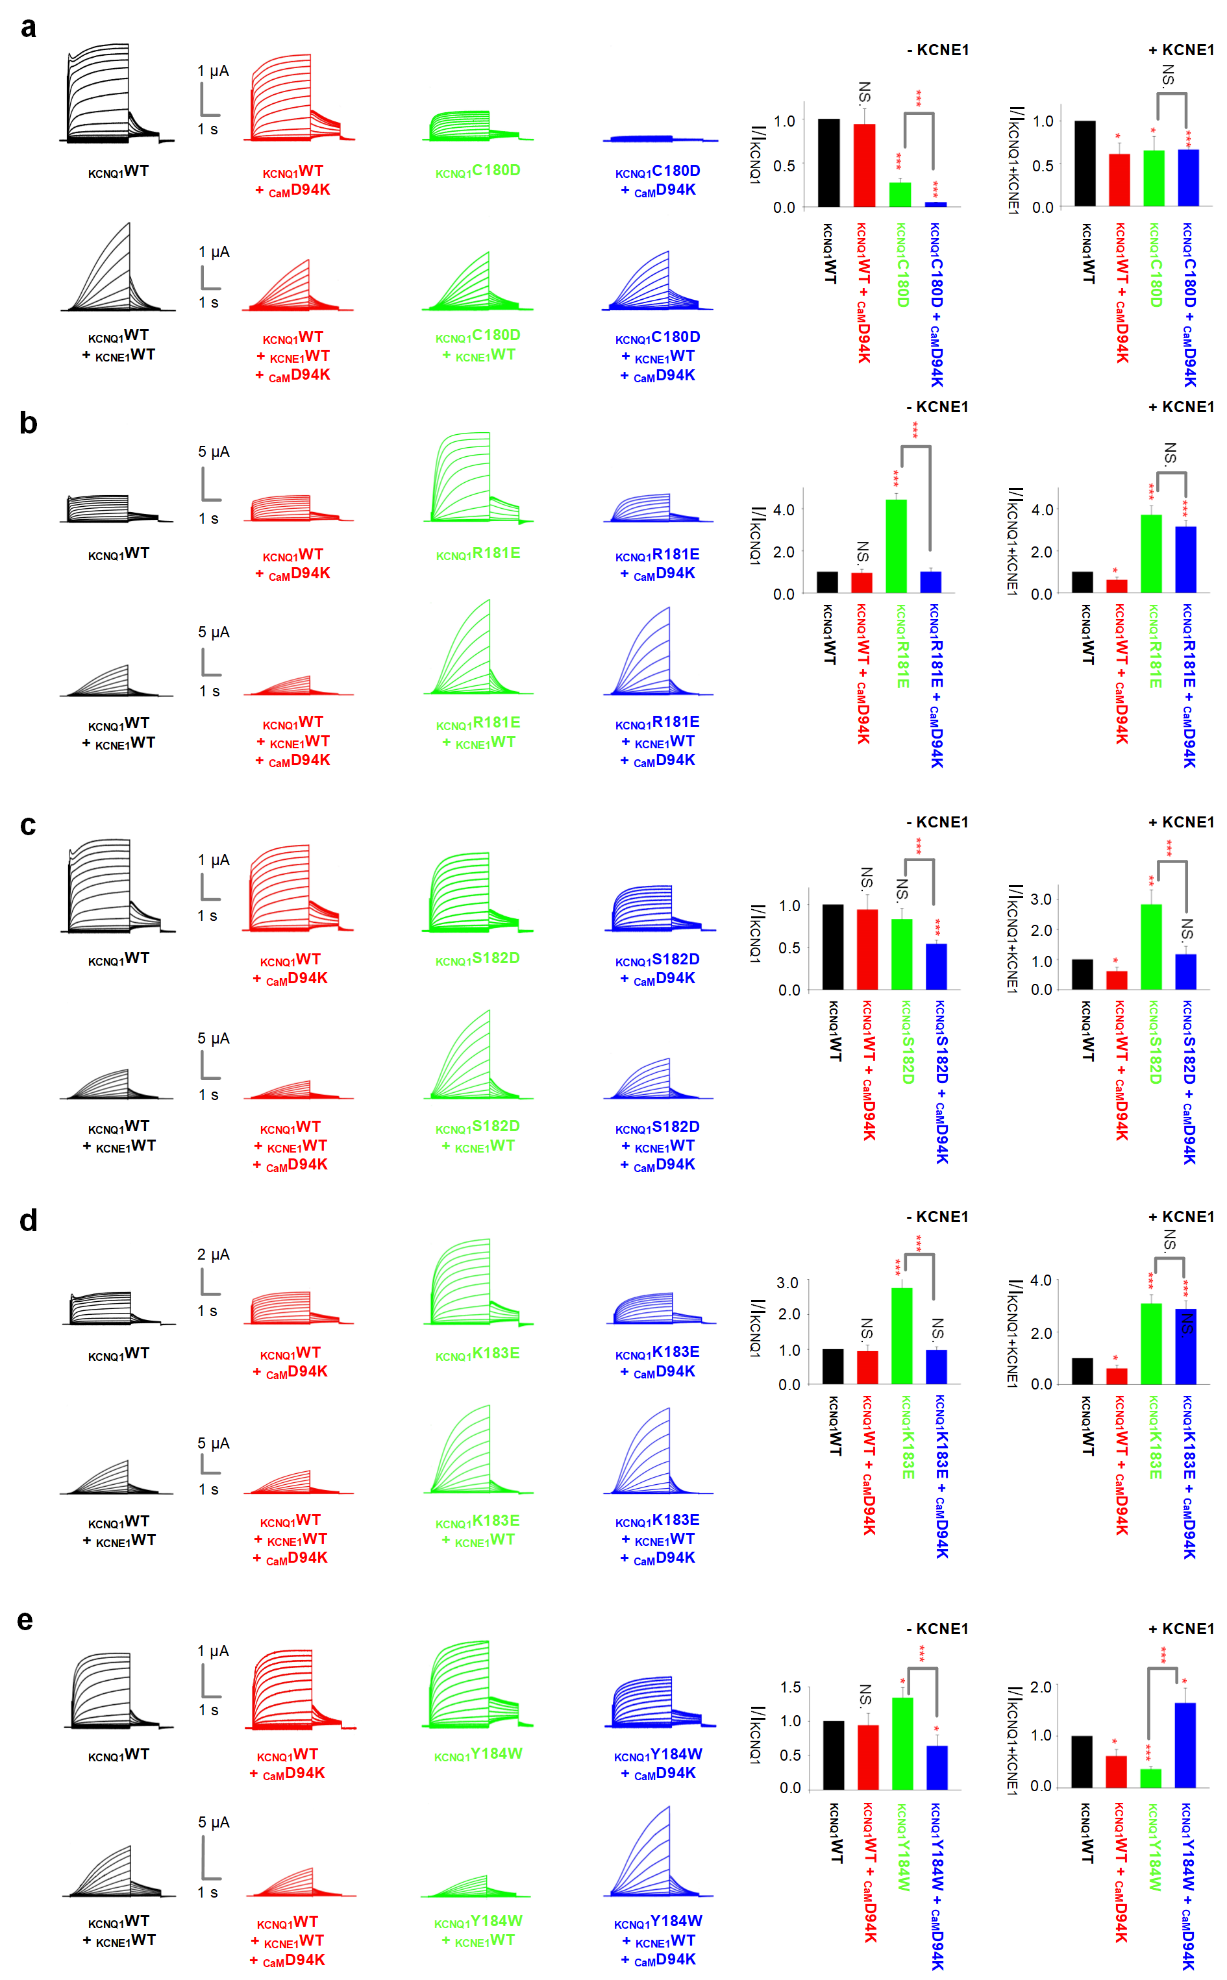


**Fig. S3 Mutation scanning of KCNQ1-S2S3L (residues: C180 to Y184) with CaM-D94**. Current tracesof KCNQ1-C180D **(a)**, R181E (**b**), S182D (**c**), K183E (**d**), and Y184W (**e**) were co-expressed with CaM-D94K. For all recording, the testing voltages were from -100 mV to +60 mV (without KCNE1, upper) or +80 mV (with KCNE1, lower) with 10 mV increments and then returned to -40 mV for measuring the tail currents. All current traces (KCNQ1-WT, KCNQ1-WT + CaM-D94K, mutant channel alone, mutant channel + CaM-D94K) were presented with a unified scale bar to clearly illustrate the differences in current amplitude. Changes in current amplitude (right) were evaluated at +40 mV (without KCNE1) and +80 mV (with KCNE1). The color of bars was the same as the current traces. The holding potential was -80 mV for all recordings. All error bars were SEM (n ≧ 10).


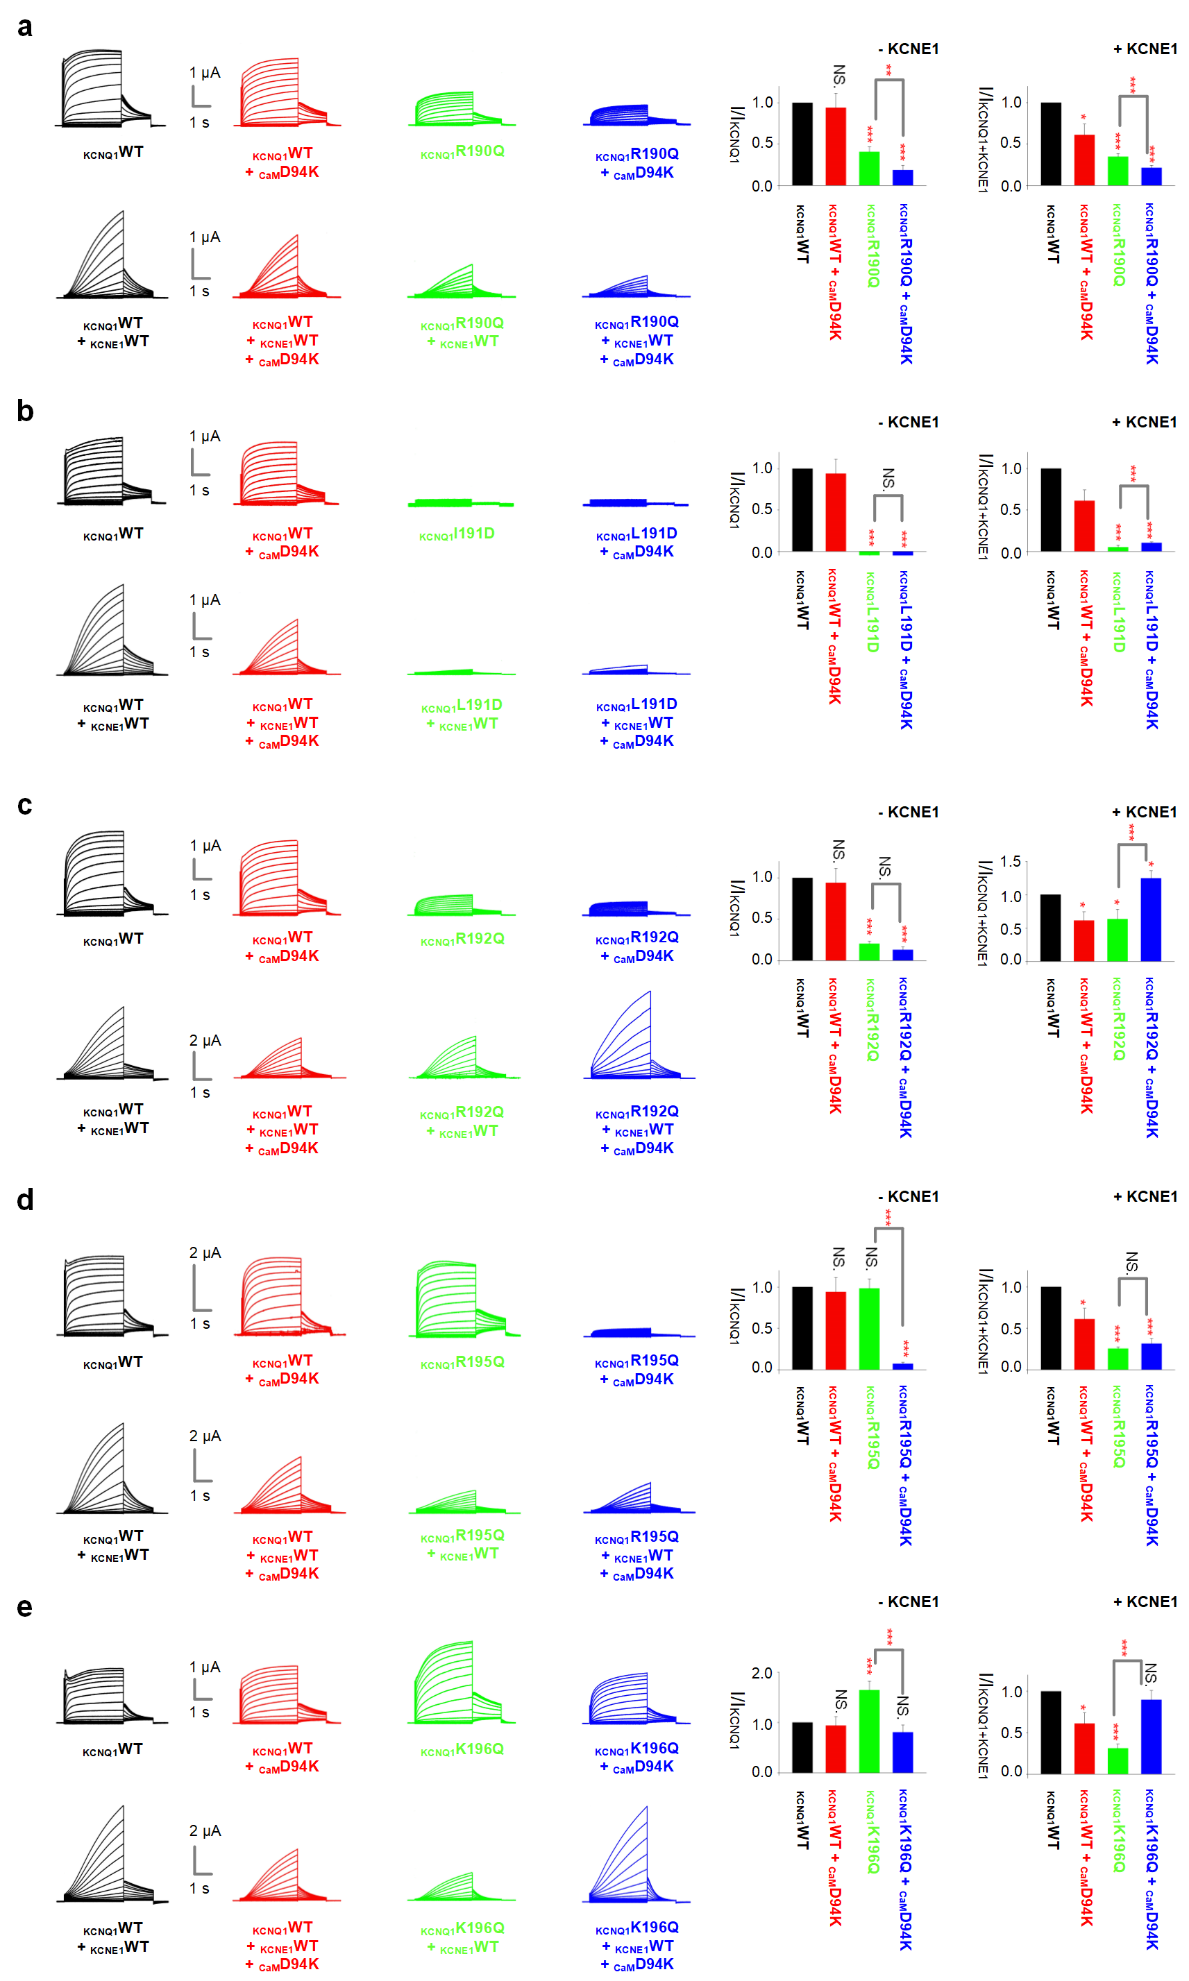


**Fig. S4 Mutation scanning of KCNQ1-S2S3L and S3 (residues: R190 to K196) with CaM-D94**. Current tracesof KCNQ1-R190Q **(a)**, L191D (**b**), R192Q (**c**), R195Q (**d**), and K196Q (**e**) were co-expressed with CaM-D94K. All current traces (KCNQ1-WT, KCNQ1-WT + CaM-D94K, mutant channel alone, mutant channel + CaM-D94K) were presented with a unified scale bar to clearly illustrate the differences in current amplitude. Changes in current amplitude (right) were evaluated at +40 mV (without KCNE1) and +80 mV (with KCNE1). The color of bars was the same as the current traces. All error bars were SEM (n ≧ 10).


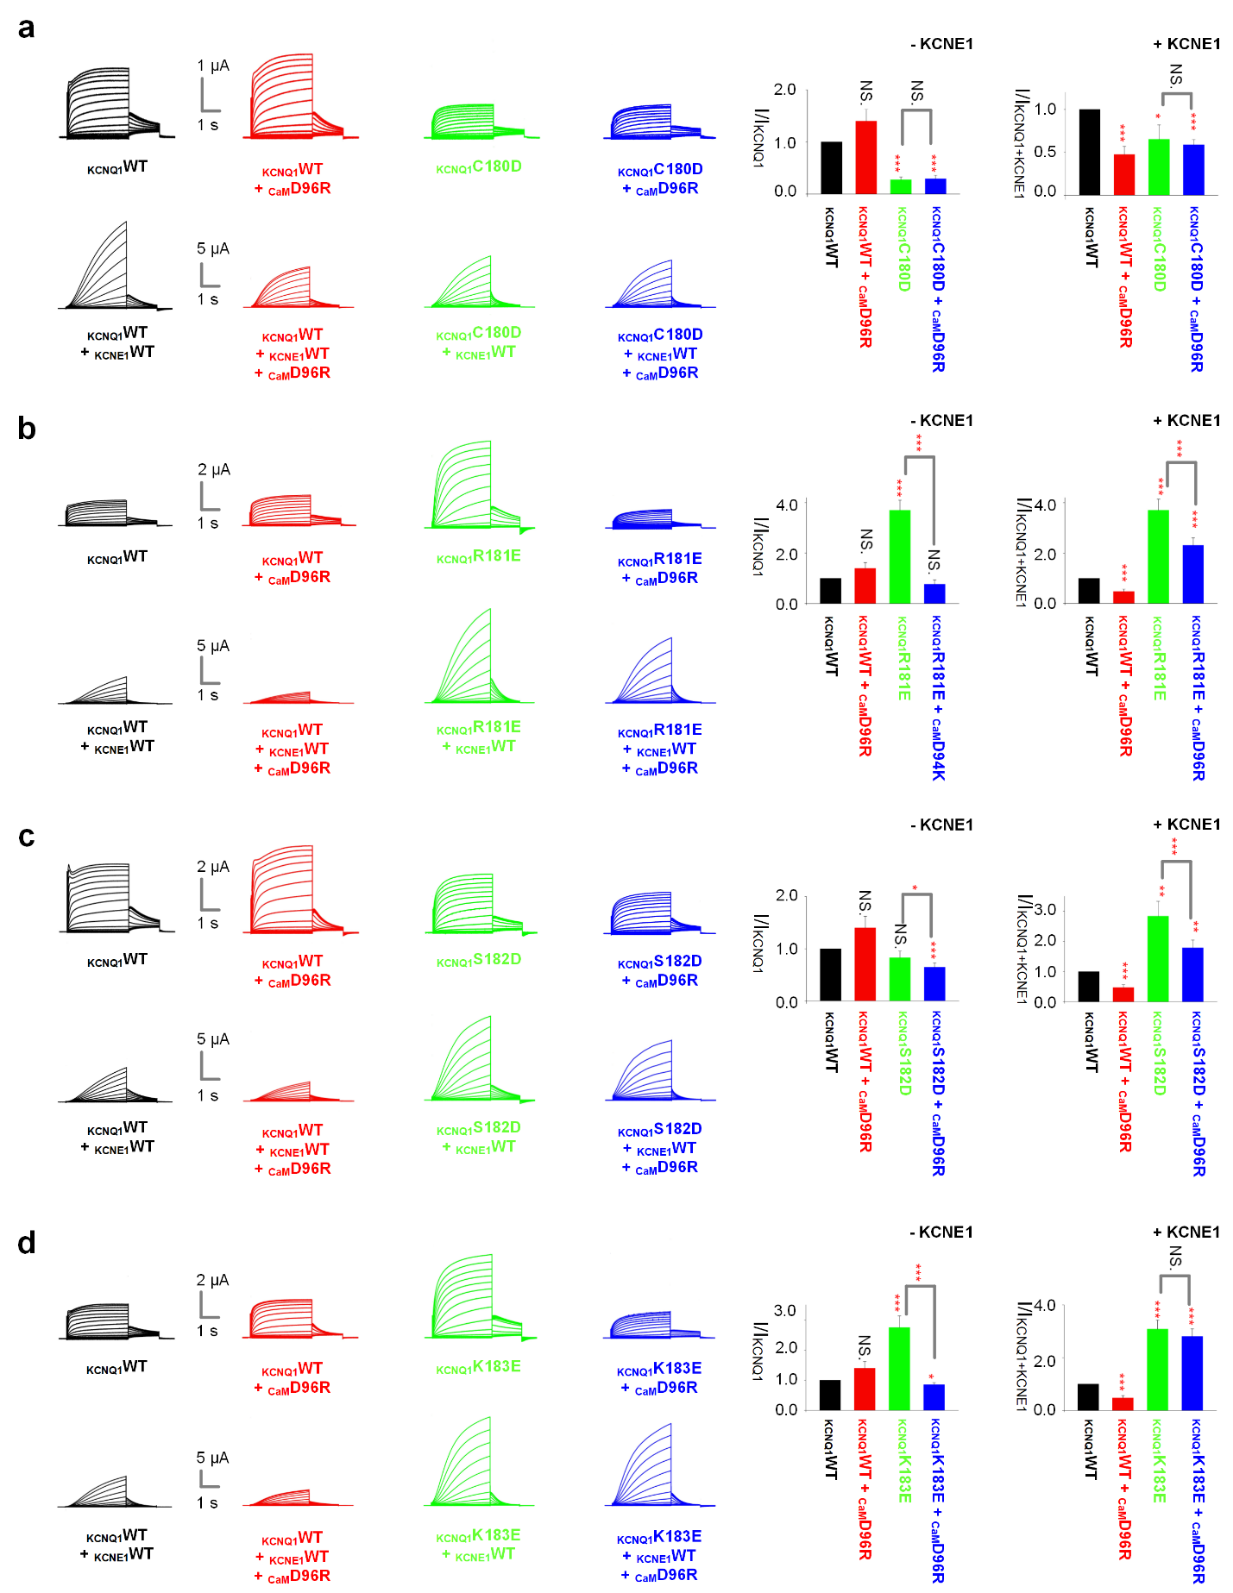


**Fig. S5 Mutation scanning of KCNQ1-S2S3L (residues: C180 to K183) with CaM-D96**. Current tracesof KCNQ1-C180D **(a)**, R181E (**b**), S182D (**c**), and K183E (**d**) were co-expressed with CaM-D96R. All current traces (KCNQ1-WT, KCNQ1-WT + CaM-D96R, mutant channel alone, mutant channel + CaM-D96R) were presented with a unified scale bar to clearly illustrate the differences in current amplitude. Changes in current amplitude (right) were evaluated at +40 mV (without KCNE1) and +80 mV (with KCNE1). The color of bars was the same as the current traces. All error bars were SEM (n ≧ 10).


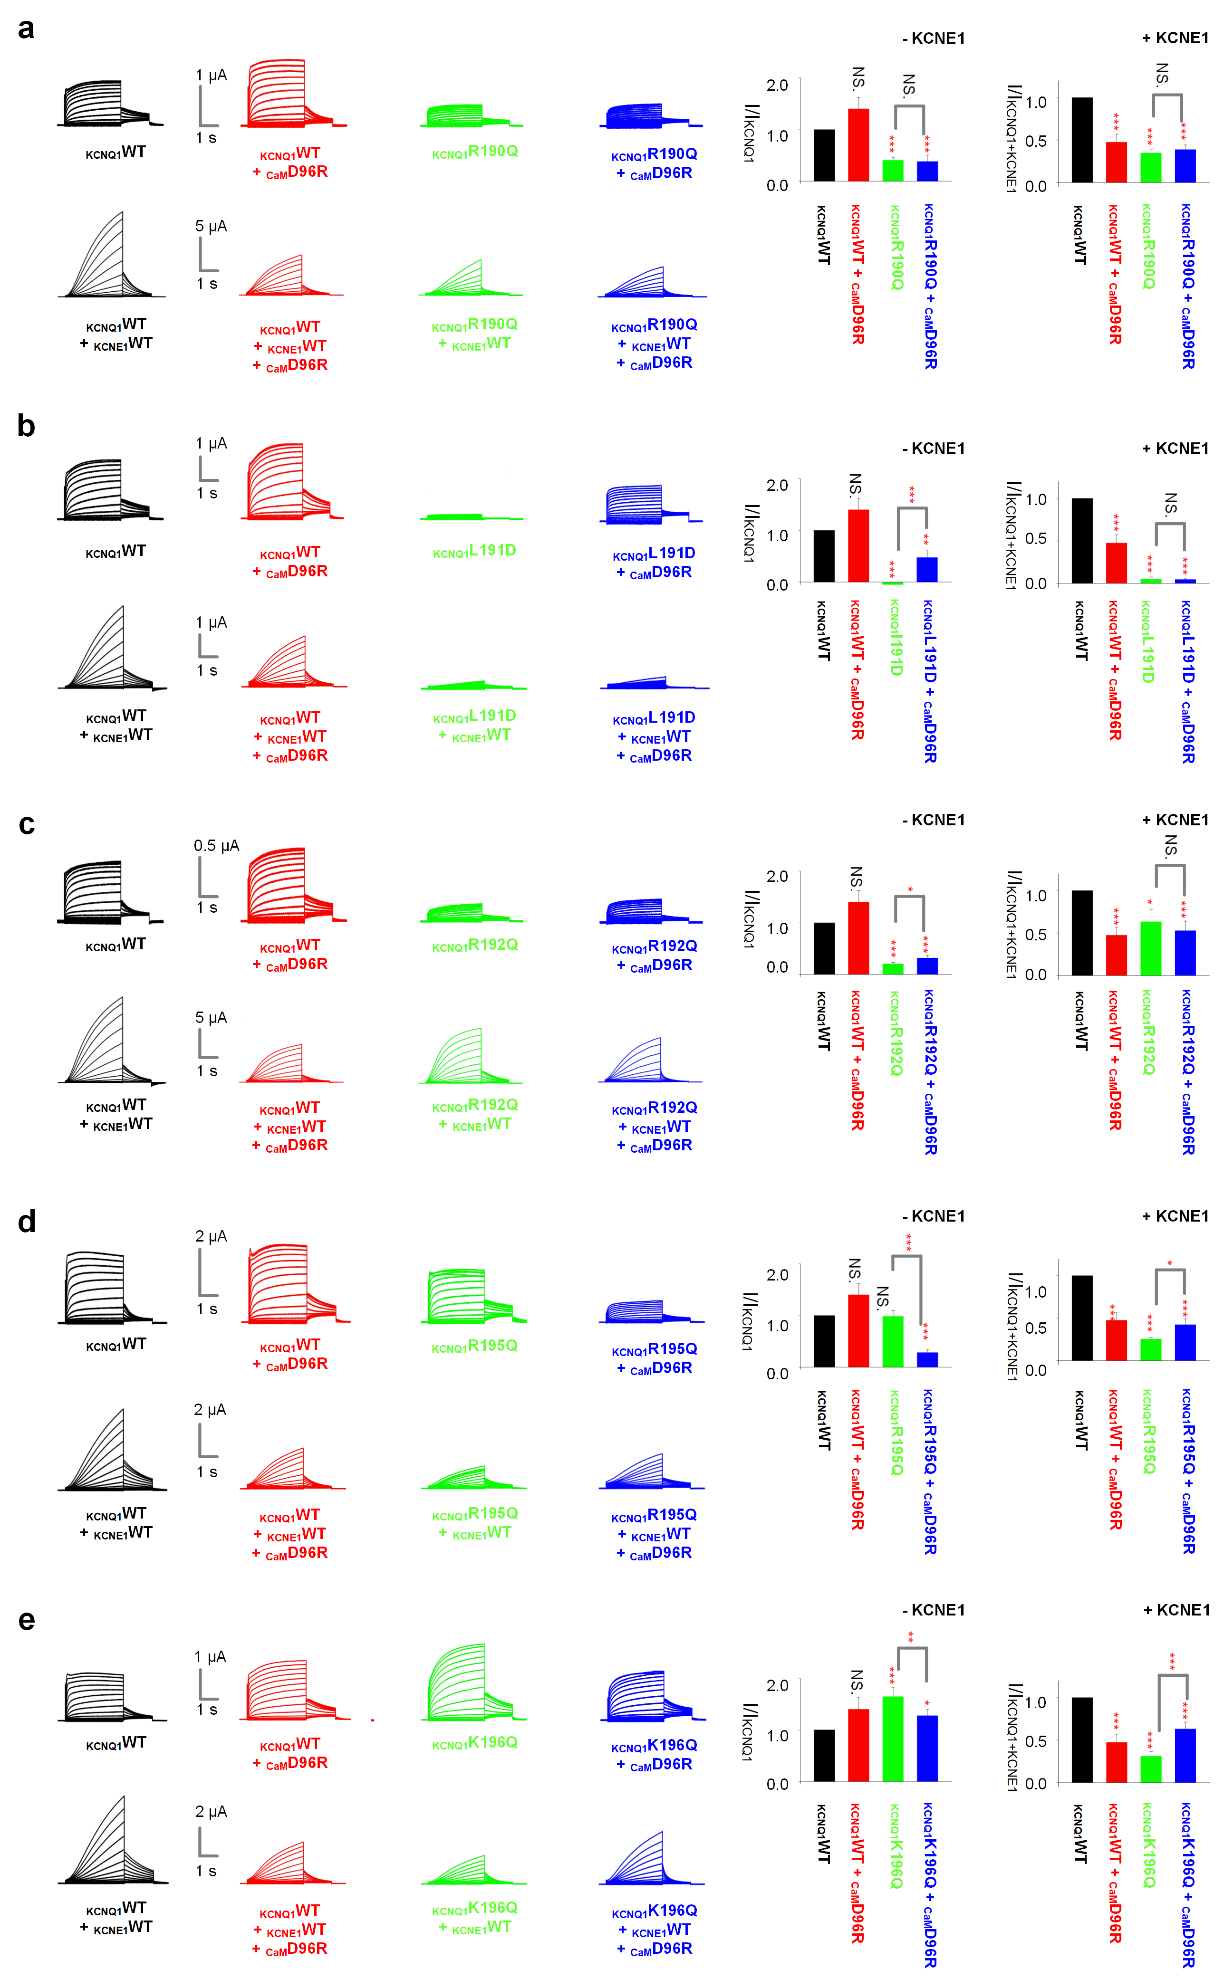


**Fig. S6 Mutation scanning of KCNQ1-S2S3L, S3 (residues: R190 to K196) with CaM-D96**. Current tracesof KCNQ1-R190Q **(a)**, L191D (**b**), R192Q (**c**), R195Q (**d**), and K196Q (**e**) were co-expressed with CaM-D96R. All current traces (KCNQ1-WT, KCNQ1-WT + CaM-D96R, mutant channel alone, mutant channel + CaM-D96R) were presented with a unified scale bar to clearly illustrate the differences in current amplitude. Changes in current amplitude (right) were evaluated at +40 mV (without KCNE1) and +80 mV (with KCNE1). The color of bars was the same as the current traces. All error bars were SEM (n ≧ 10).


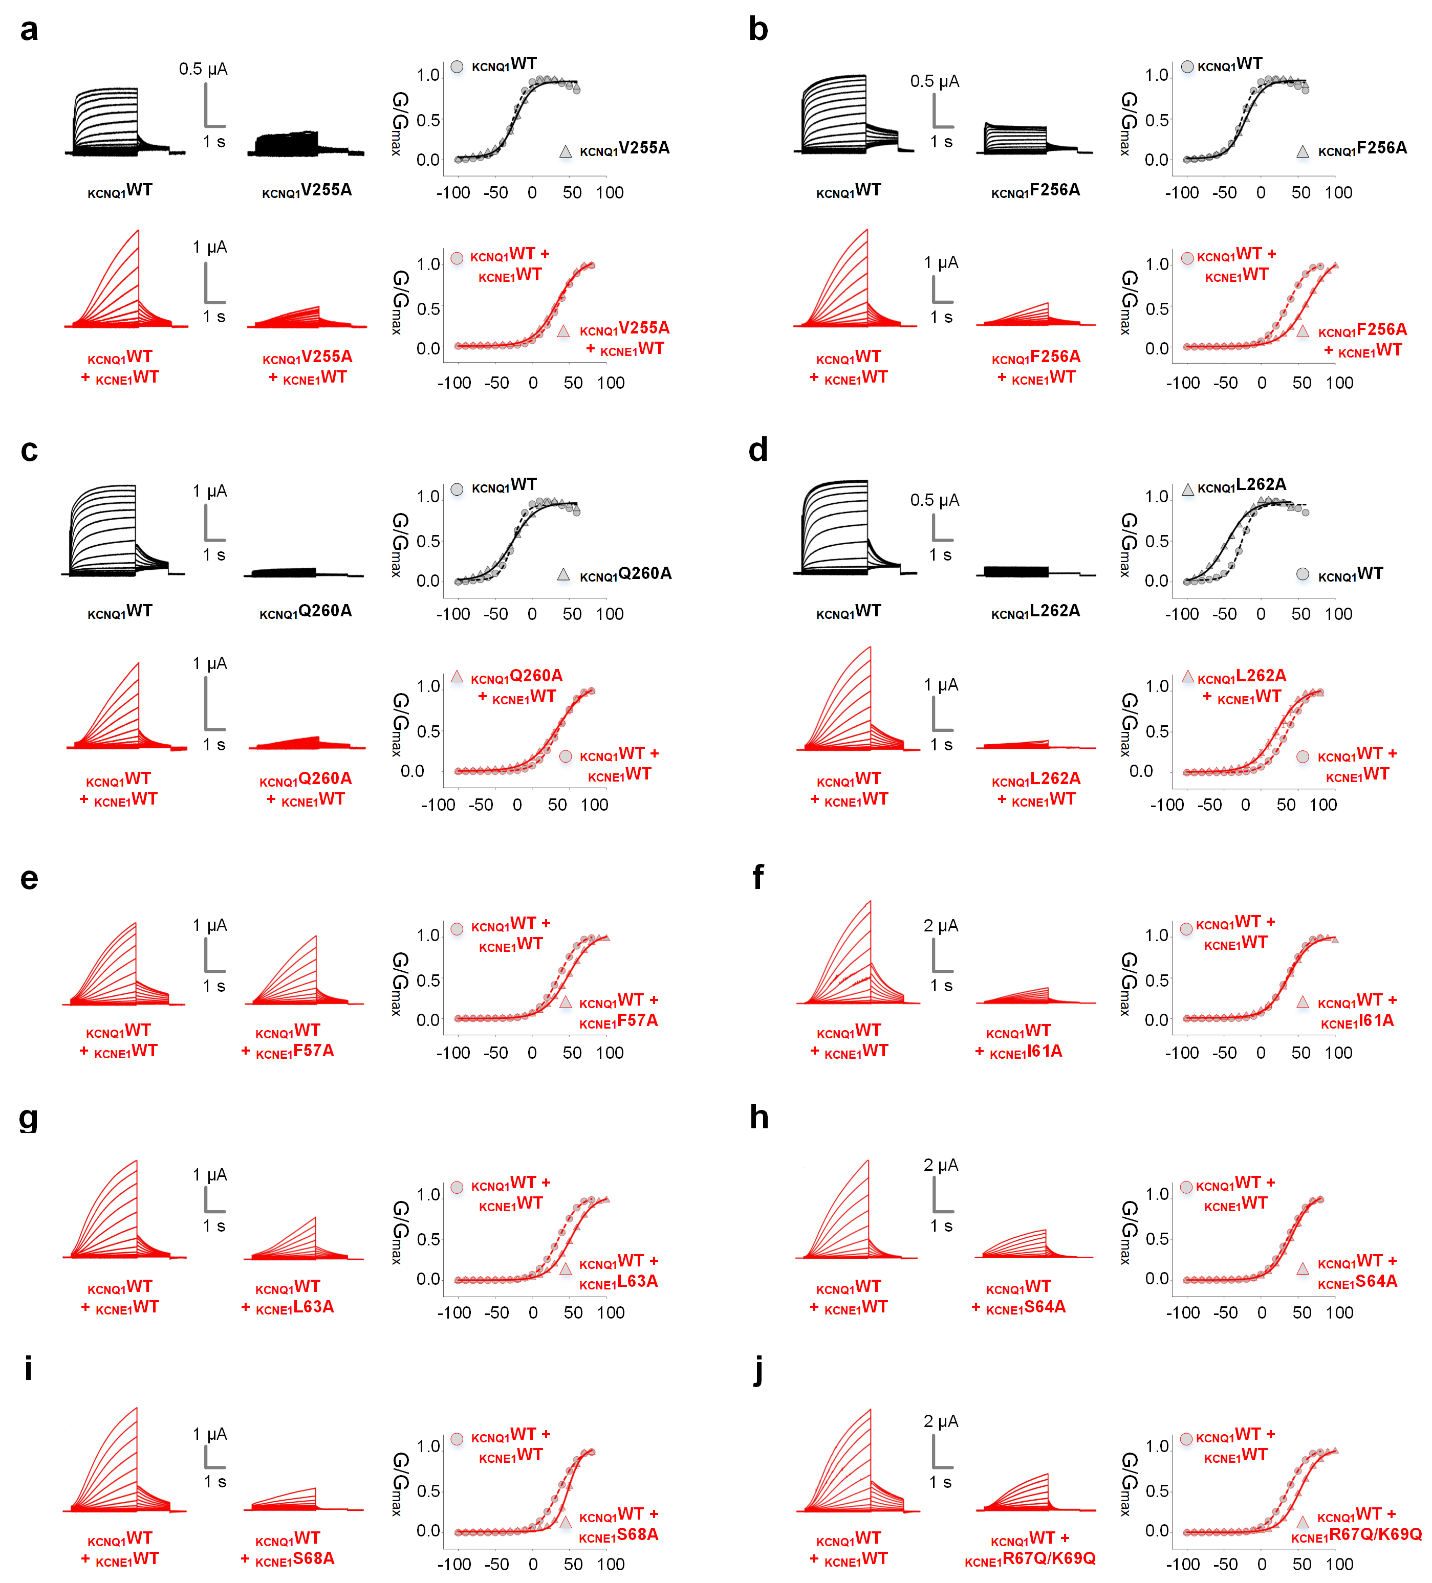


**Fig. S7 Electrophysiological recordings of C-PIP2 binding residues in both KCNQ1 and KCNE1**. All these residues interact with C-PIP2 in both the bent and straight conformations. Currents traces of representative mutated channels (middle) were displayed without (black) and with (red) KCNE1 co-expression. The KCNQ1-WT or IKs current traces (left) were presented with a unified scale bar to clearly illustrate the differences in current amplitude. The Average G-V relationship (right) comparison with WT channels. (n ≧ 8).


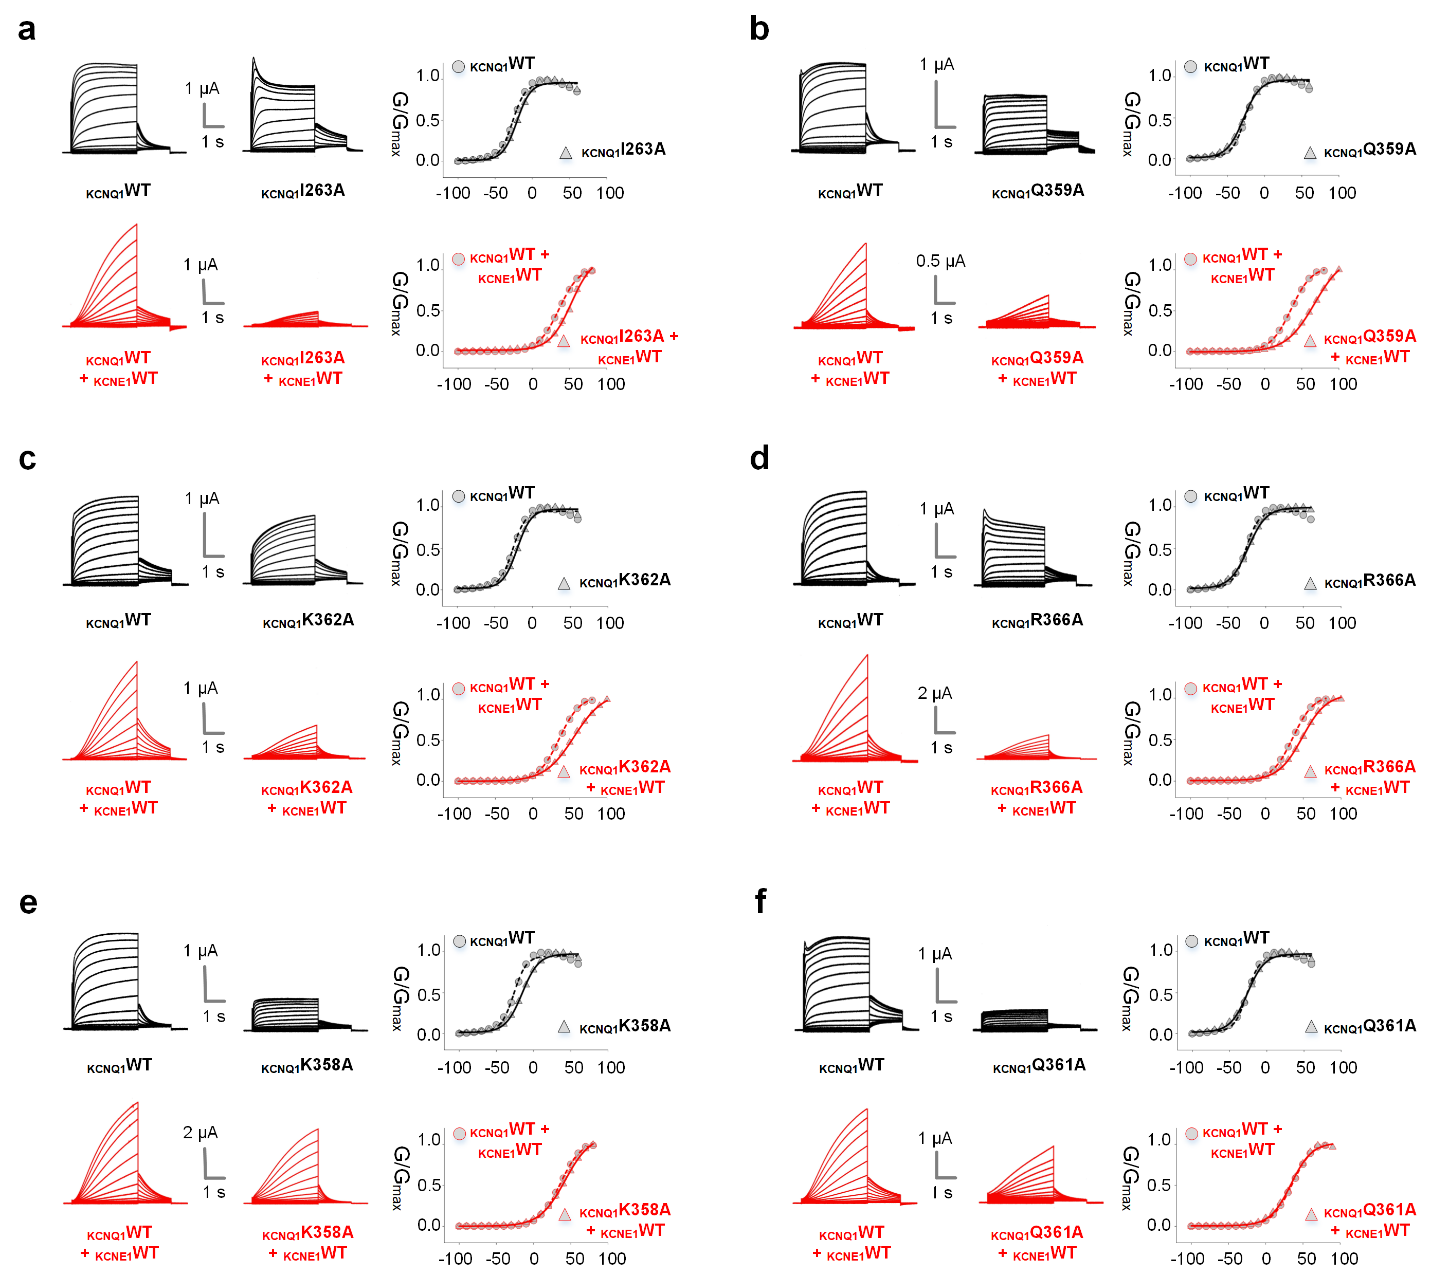


**Fig. S8 Electrophysiological recordings of additional C-PIP2 binding residues in KCNQ1**. (**a-d**) Residues that specifically interact with C-PIP2 in the straight conformation. (**e-f**) Residues that specifically interact with C-PIP2 in the bent conformation. Current traces were displayed without (black) and with (red) KCNE1 co-expression. The KCNQ1-WT or IKs current traces (left) were presented with a unified scale bar to clearly illustrate the differences in current amplitude. Average G-V relationship (right) comparison with WT channels. (n ≧ 8).


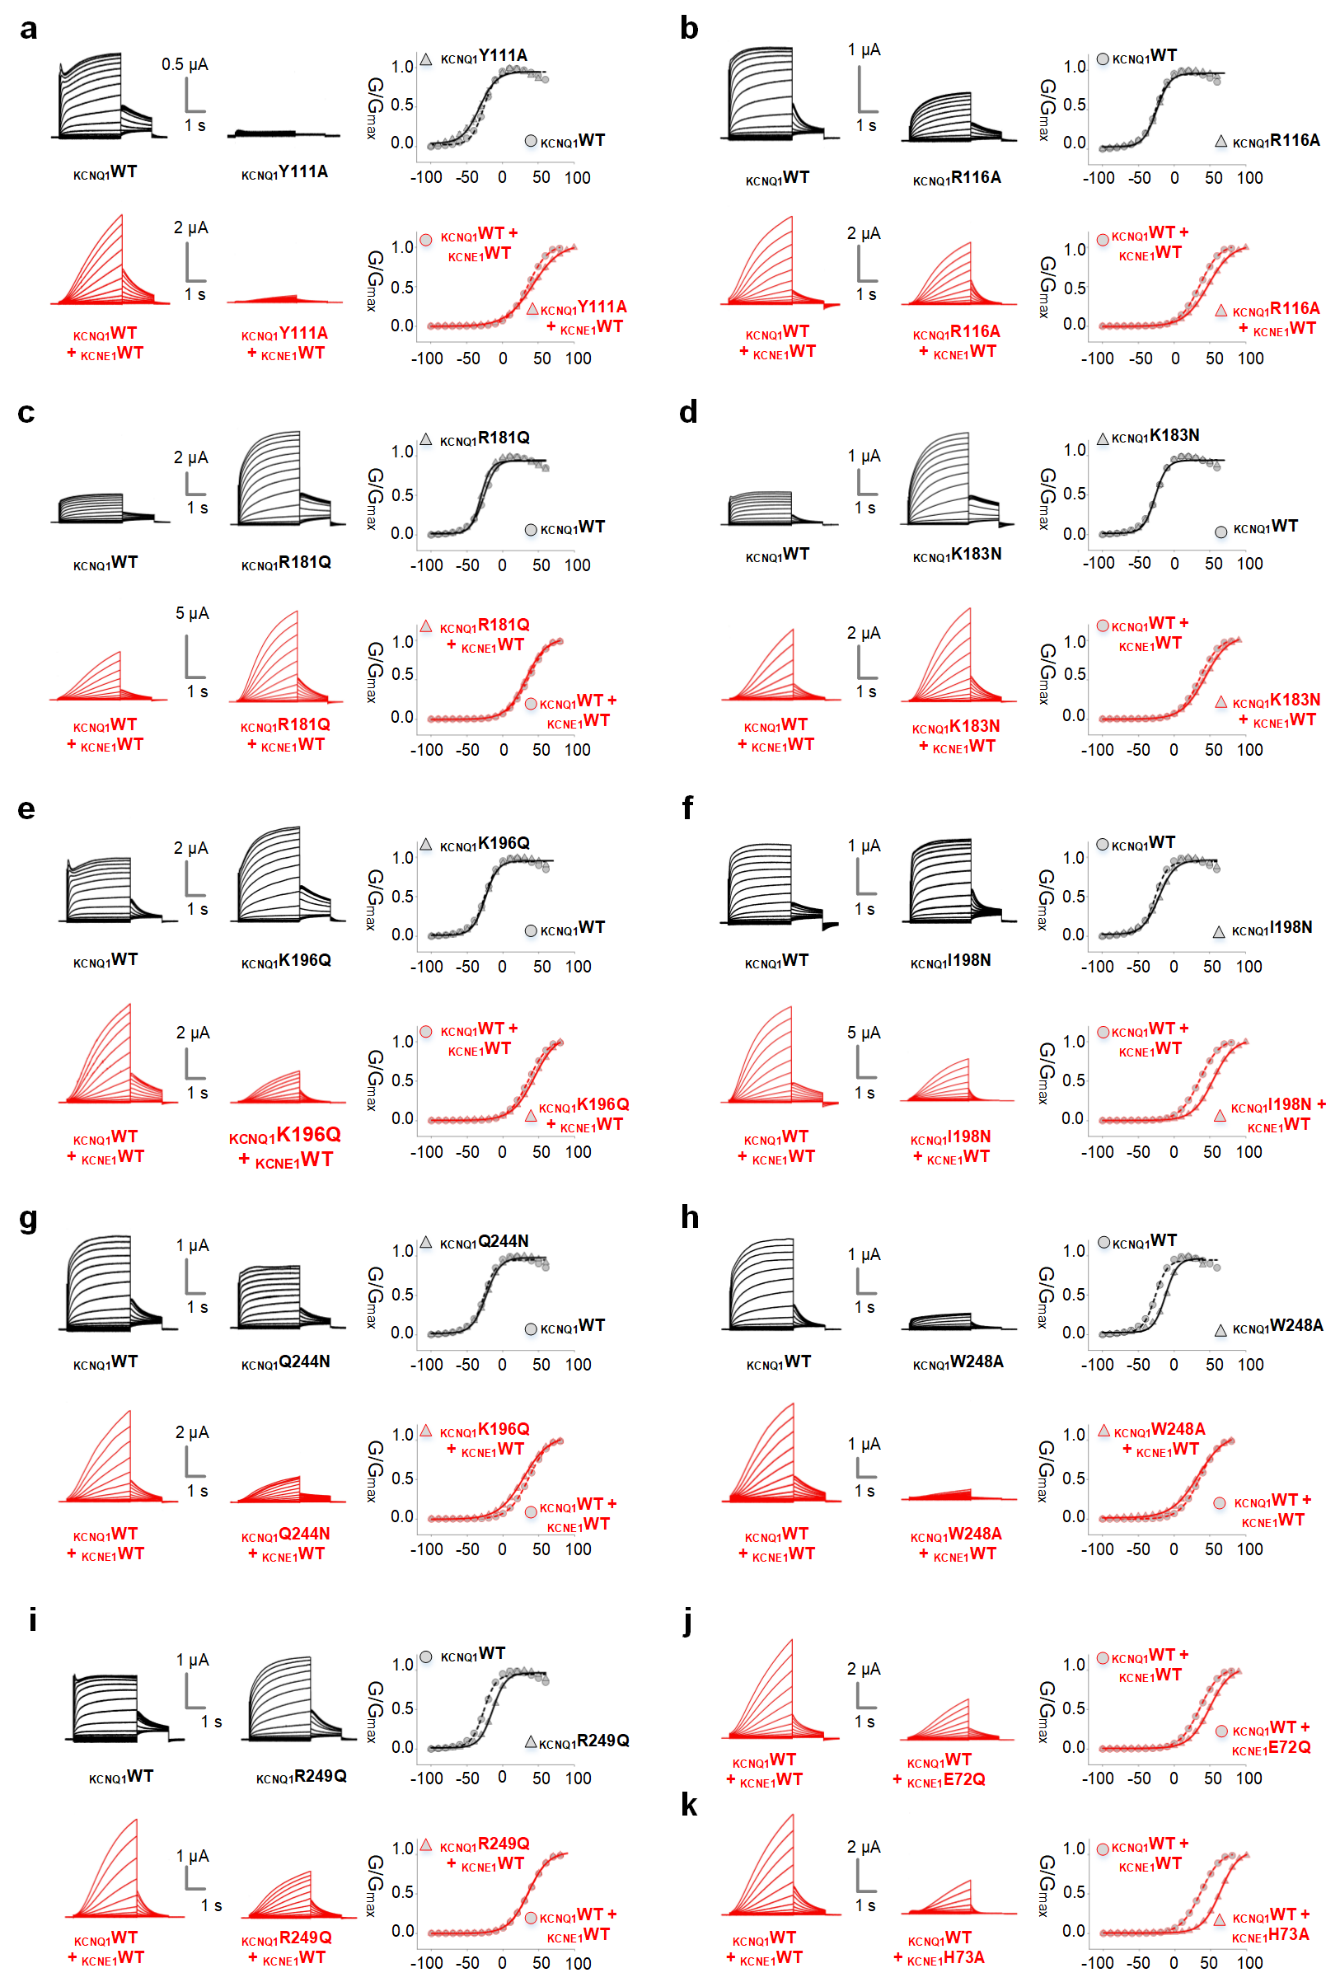


**Fig. S9 Electrophysiological recordings of V-PIP2 binding residues in KCNQ1 and KCNE1**. Current traces were displayed without (black) and with (red) KCNE1 co-expression. The KCNQ1-WT or IKs current traces (left) are presented with a unified scale bar to clearly illustrate the differences in current amplitude. Average G-V relationship (right) comparison with WT channels. (n ≧ 8).


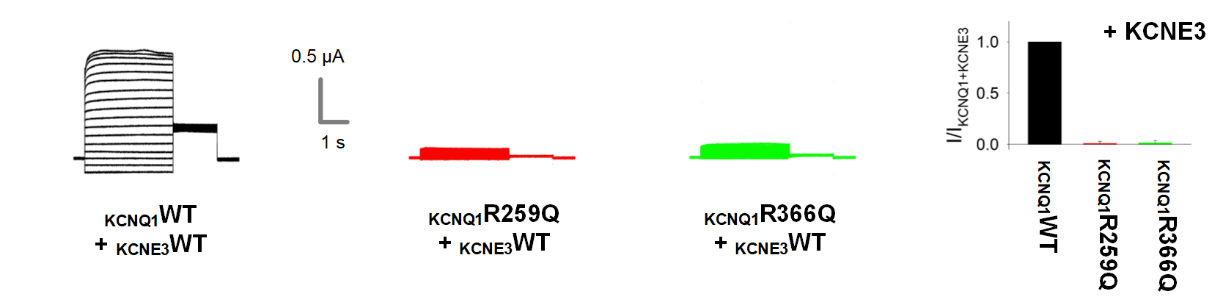


**Fig. S10 Electrophysiological recordings of C-PIP2 binding residues co-expressed with KCNE3**. The testing voltages were from -100 mV to +60 mV with 10 mV increments and then returned to -40 mV (n ≧ 8). The KCNQ1-WT + KCNE3-WT (left) traces were presented with a unified scale bar to clearly illustrate the differences in current amplitude. Changes in current amplitude were evaluated at +40 mV. The color of bars is the same as the current traces. All error bars were SEM (n ≧ 10).


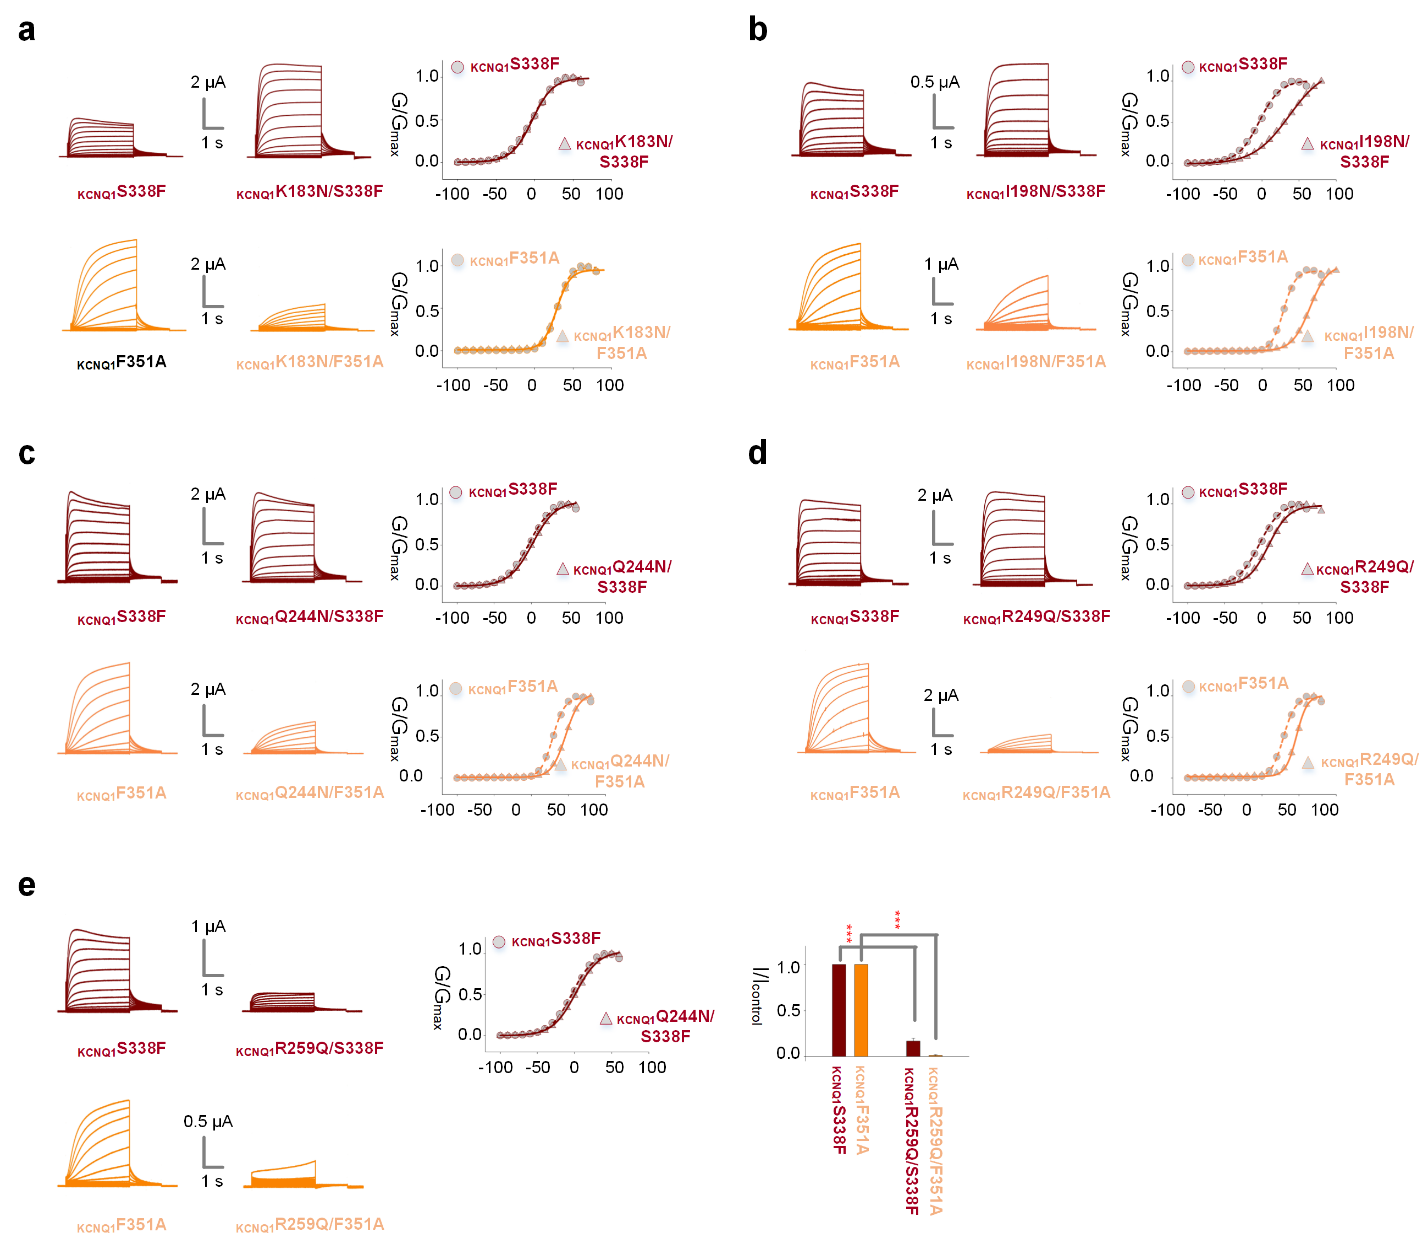


**Fig. S11 Electrophysiological recordings of V-PIP2 binding residues in the KCNQ1S338F and KCNQ1F351A backgrounds**. KCNQ1-S338F and KCNQ1-F351A open to the IO and AO state, respectively 1,2. (**a-d**) Current traces of KCNQ1-S338F (upper left) andKCNQ1-F351A(lower left), and V-PIP2 site mutant channels with the KCNQ1-S338Fand KCNQ1-F351A background (middle), respectively. G-V relationship of the mutant channels in comparison with the background KCNQ1-S338F (upper right) and KCNQ1-F351A (lower right), respectively. The testing voltages were from -100 mV to +60 mV (KCNQ1-S338F) or +80 mV (KCNQ1-F351A) with 10 mV increments and then returned to -40 mV for measuring the tail currents. (**e**) A C-PIP2 site mutant channel with the KCNQ1-S338F and KCNQ1-F351A background, respectively. Right, current amplitudes of selected C-PIP2 mutants (+40 mV with KCNQ1-S338F, +80 mV with KCNQ1-F351A). The color of bars was the same as the current traces. All error bars are SEM (n ≧ 8).


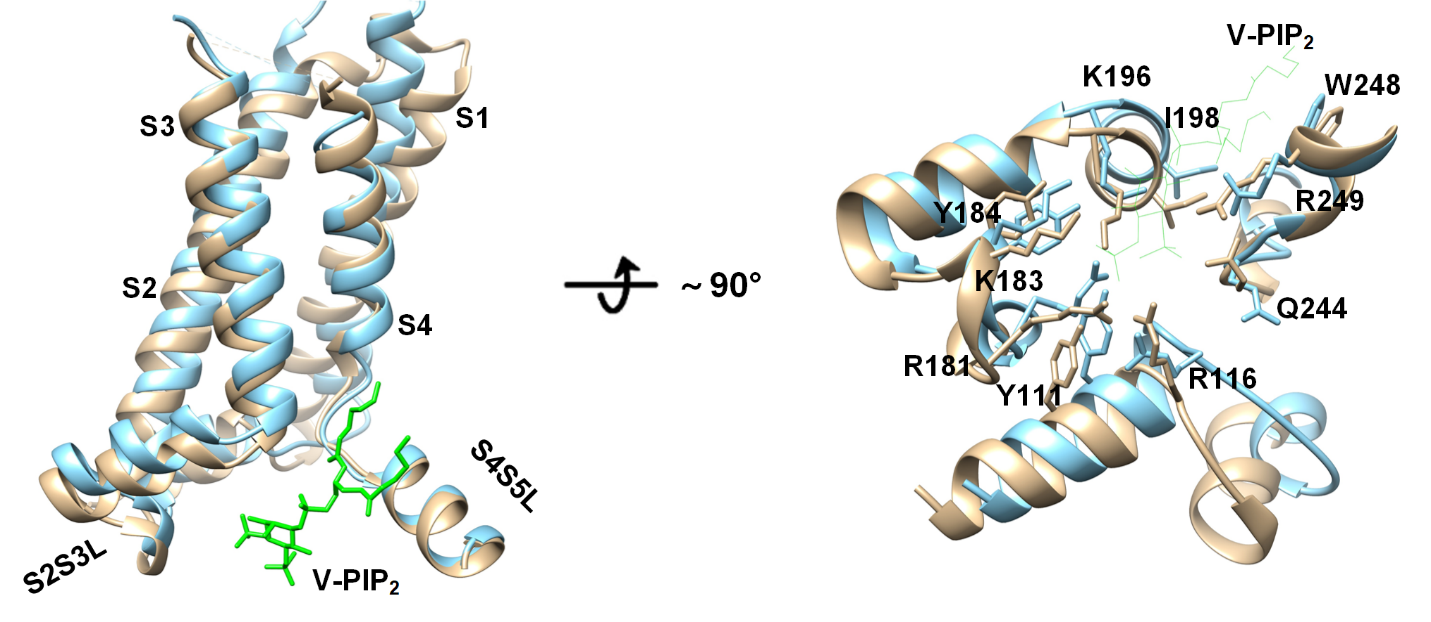


**Fig. S12 Structural comparison of the V-PIP2 binding site on KCNQ1 between the straight and bent conformations**. The straight (KCNQ1-KCNE1) and bent (KCNQ1-E1R/R2E) conformations are depicted in tan and sky blue, respectively. The structures were aligned based on the S4 and S4-S5L regions of the VSD. In the straight conformation, the S1, S2, S3 helices and the S2S3L shift away from the S4 and S4S5L, compared to their positions in the bent conformation. This conformational change creates a pocket that accommodates V-PIP2 binding. In the right panel, the side chains of residues interacting with V-PIP2 are depicted using stick representations.


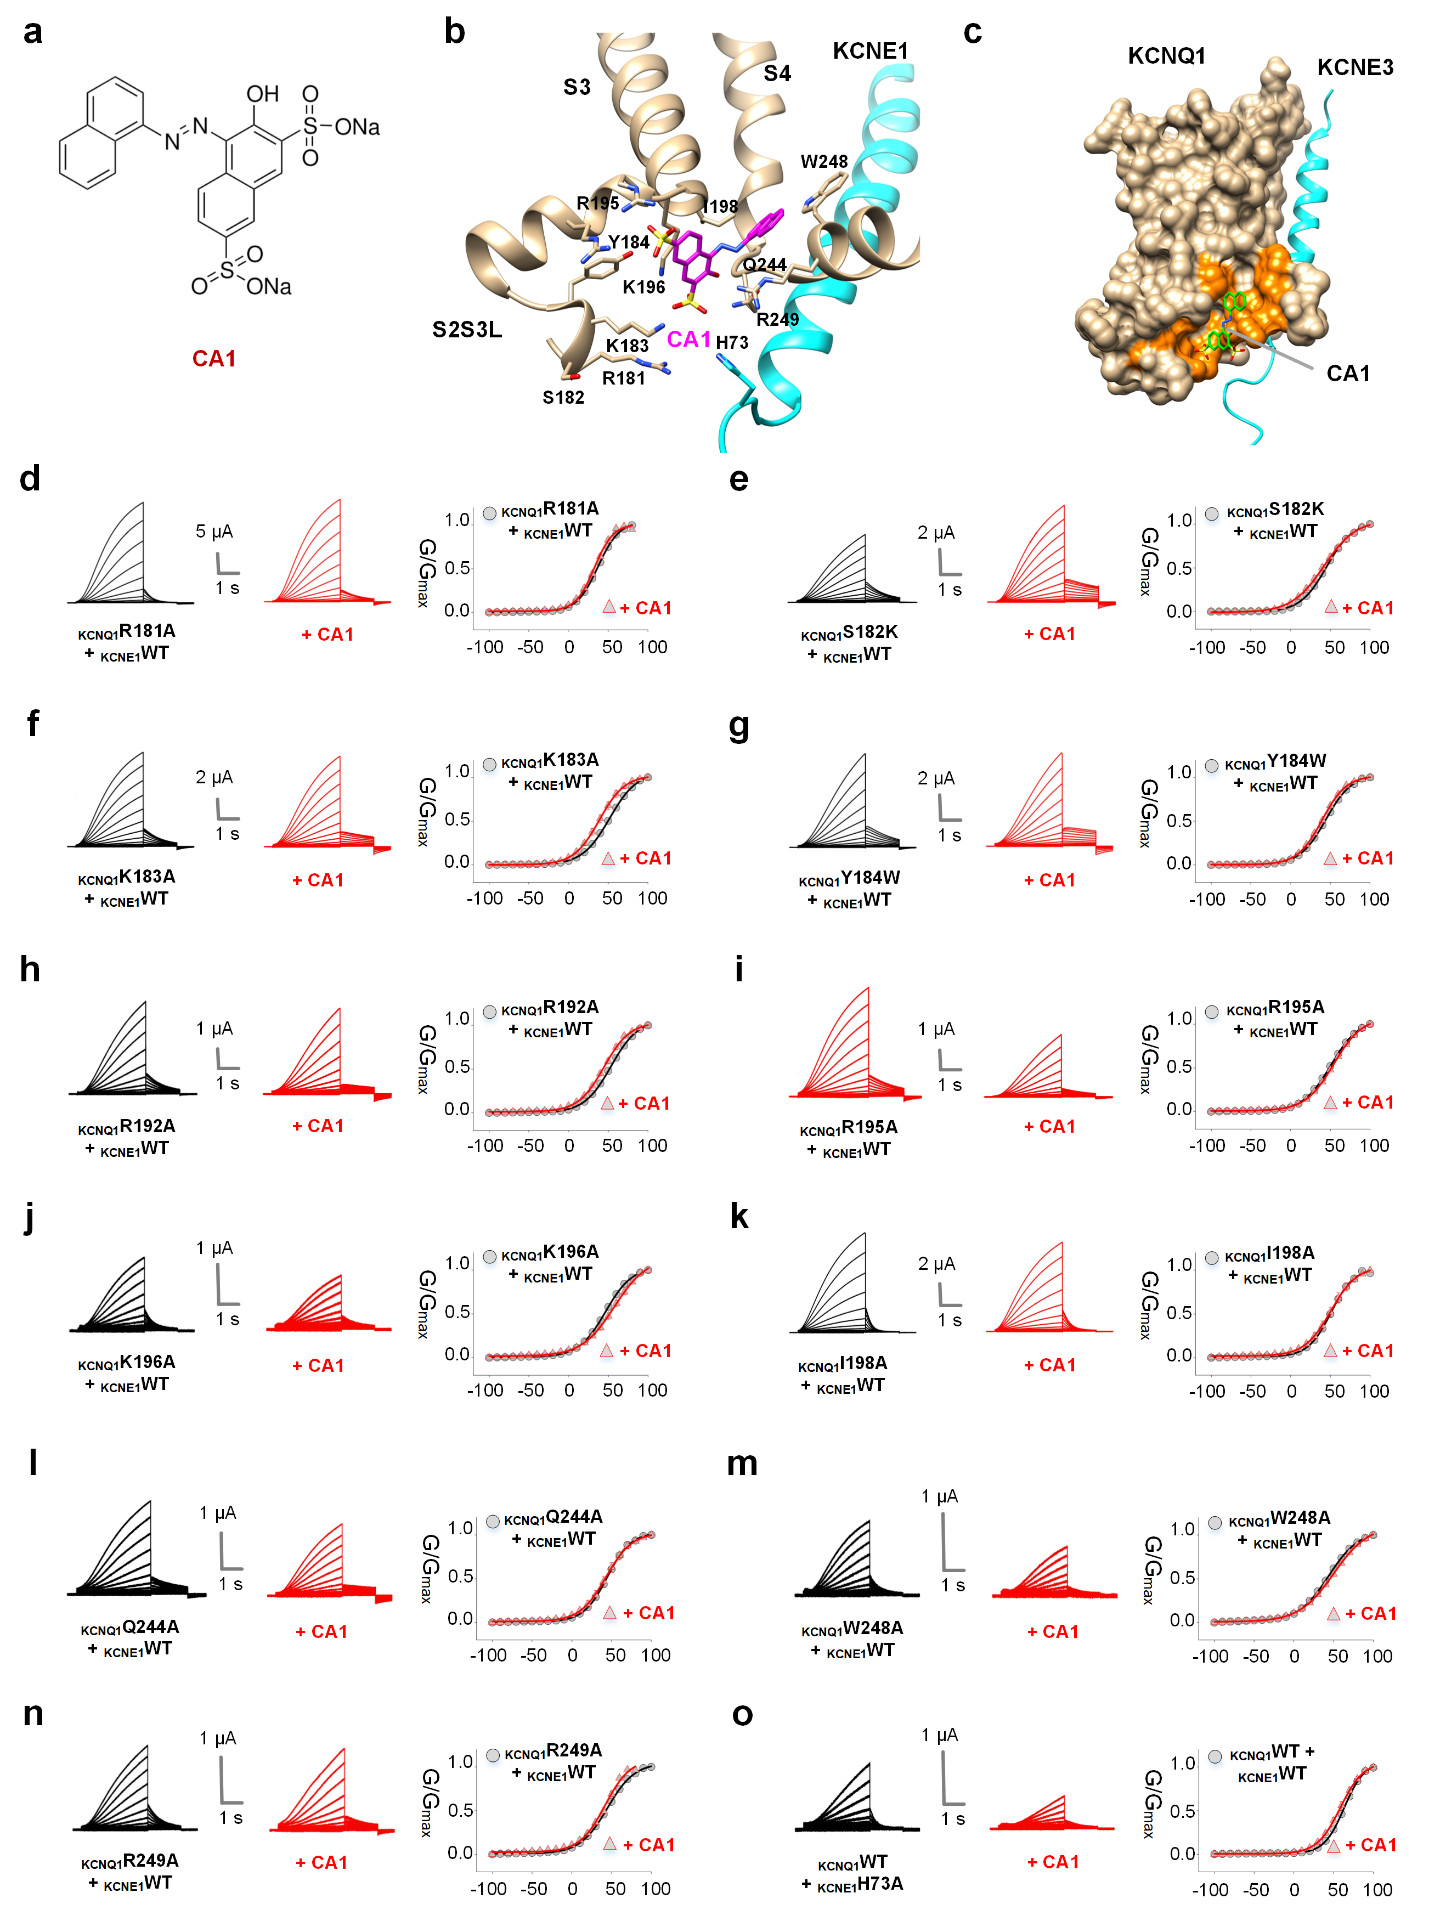


**Fig. S13 The effects of CA1 on KCNQ1-mutation + KCNE1-WT and mutation channels** (**a**) CA1 chemical structure. (**b**) The putative CA1 binding pocket in the straight conformation KCNQ1-KCNE1 (PDB: 9VEI). The KCNQ1 and KCNE1 are depicted in tan and sky blue, respectively. (**c**) Structure model of CA1 binds to the straight conformation of KCNQ1-KCNE3 (PDB: 6v01). (**d-o**) Electrophysiological recordings of CA1 effects on mutations of all putative binding residues on (**b**). Current traces were recorded before (black) and after (red) adding 10 μM CA1. Averaged G-V relationship (right) before (black) and after (red) 10 μM CA1 (n ≧ 3).


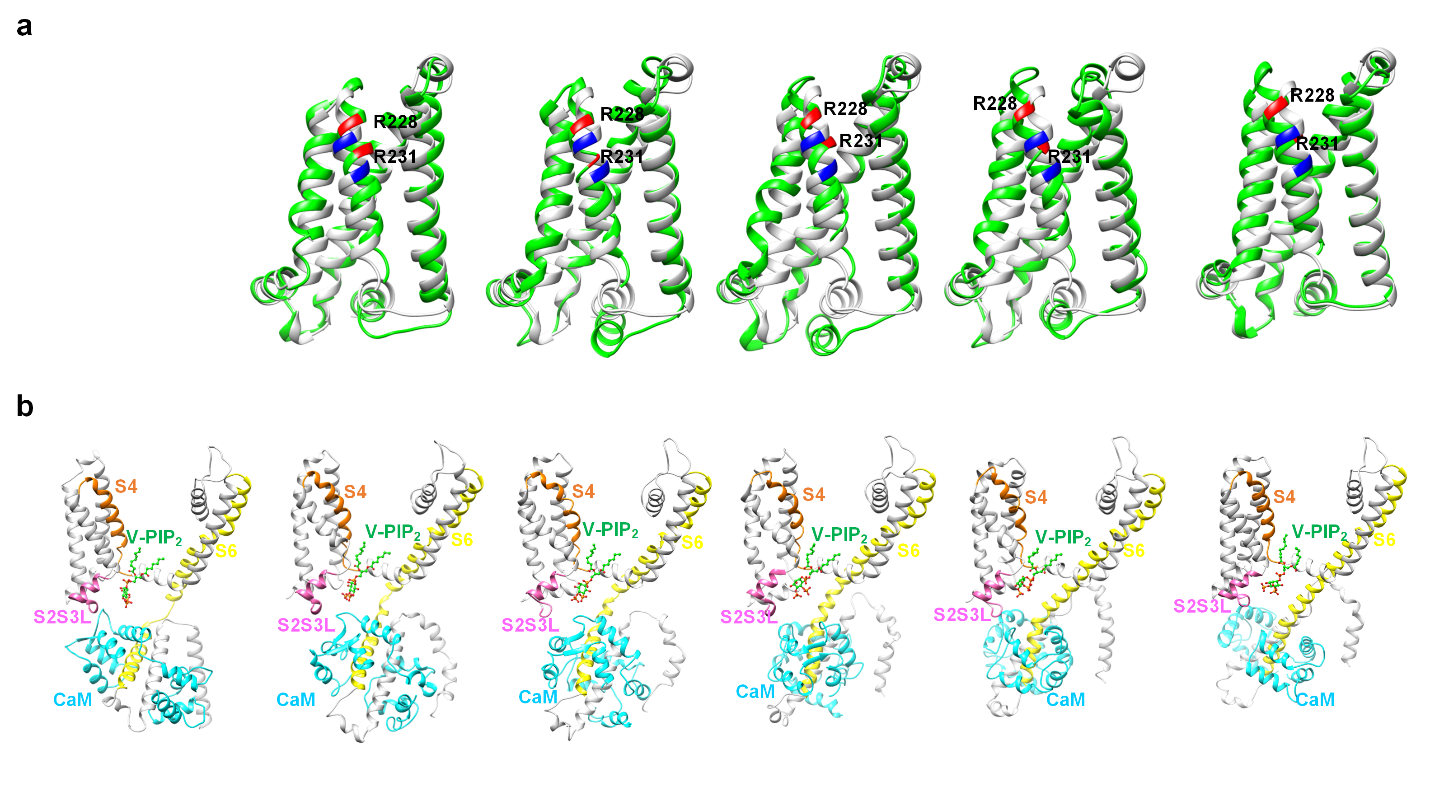


**Fig. S14 Conformation transition from the bent conformation to the straight conformation in the presence of V-PIP2**. (**a**) Zoom-in snapshots to highlight S4 movements by superimposing selected simulation snapshots (green) with the bent conformation (light grey). From left to right: Snapshots 1-4 superimposed with the bent conformation, and the straight conformation superimposed with the bent conformation. As the left figure in panel A is the bent initial conformation, it does not include an additional figure superimposed upon itself in panel B. Charged residues R228 and R231 are labeled in red in simulation snapshots and in blue in the bent conformation. (**b**) Snapshots from the TMD stimulation illustrating the conformational from the bent conformation to the straight conformation. From left to right: bent conformation (initial structure, KCNQ1-E1R/R2E), Snapshots 1-4, and straight conformation (Targeted structure, KCNQ1-KCNE1). CaM is colored in cyan, V-PIP2 is colored in green, S2S3L is colored in pink, S4 is colored in orange, and S6 is colored in yellow.

**References**

1 Zaydman, M. A. *et al.* Domain–domain interactions determine the gating, permeation, pharmacology, and subunit modulation of the IKs ion channel. *Elife* 3, e03606 (2014).

2 Hou, P. *et al.* Inactivation of KCNQ1 potassium channels reveals dynamic coupling between voltage sensing and pore opening. *Nature communications* 8, 1730 (2017).
